# Supplementary material for: Phytochemical Constituents and Biological Activities of the Unexplored Plant Rhinanthus angustifolius subsp. grandiflorus
Source: MDPI journal article supplement (doi:10.3390/app11199162), 2021-10-01
Supplement: s1 [file s1]

**Table S6.** Semi-quantitative values of the main polyphenol classes of *Rhinanthus angustifolius* extracted with different methods (i.e., homogenizer, maceration, soxhlet) and different solvents (ethyl acetate, ethanol, methanol, water).

| Methods           | Solvents | Anthocyanins              | Flavones                   | Flavonols                  | Lignans                    | LMW phenolics              | Phenolic acids             | Stilbenes                  |
|-------------------|----------|---------------------------|----------------------------|----------------------------|----------------------------|----------------------------|----------------------------|----------------------------|
| Homogenizer (HAE) | EA       | 4.77 ± 0.13 <sup>b</sup>  | 23.6 ± 0.65 <sup>bc</sup>  | 8.55 ± 0.54 <sup>de</sup>  | 23.53 ± 2.08 <sup>ef</sup> | 65.29 ± 4.46 <sup>c</sup>  | 8.99 ± 1.19 <sup>cd</sup>  | 2.24 ± 0.67 <sup>efg</sup> |
|                   | EtOH     | 4.28 ± 0.19 <sup>bc</sup> | 29.19 ± 1.17 <sup>a</sup>  | 12.13 ± 0.06 <sup>c</sup>  | 43.28 ± 1.11 <sup>b</sup>  | 72.34 ± 2.25 <sup>b</sup>  | 13.5 ± 2.57 <sup>ab</sup>  | 2.18 ± 0.5 <sup>efg</sup>  |
|                   | MetOH    | 6.96 ± 0.08 <sup>a</sup>  | 30.61 ± 4.49 <sup>a</sup>  | 17.8 ± 0.7 <sup>a</sup>    | 20.63 ± 0.99 <sup>fg</sup> | 80.32 ± 2.66 <sup>a</sup>  | 12.97 ± 1.33 <sup>ab</sup> | 3.28 ± 0.79 <sup>bcd</sup> |
|                   | H2O      | 2.81 ± 0.7 <sup>d</sup>   | 12.41 ± 1.35 <sup>e</sup>  | 5.71 ± 0.58 <sup>ef</sup>  | 26.44 ± 1.15 <sup>e</sup>  | 46.34 ± 3.36 <sup>de</sup> | 8.69 ± 0.2 <sup>cd</sup>   | 4 ± 0.85 <sup>bc</sup>     |
| Maceration (MAC)  | EA       | 3.73 ± 0.05 <sup>c</sup>  | 18.49 ± 0.1 <sup>d</sup>   | 4.93 ± 0.15 <sup>fg</sup>  | 49.68 ± 0.65 <sup>a</sup>  | 60.4 ± 5.99 <sup>c</sup>   | 9.16 ± 0.99 <sup>cd</sup>  | 1.79 ± 0.33 <sup>fg</sup>  |
|                   | EtOH     | 4.61 ± 0.29 <sup>b</sup>  | 27.27 ± 0.83 <sup>ab</sup> | 13.32 ± 1.78 <sup>bc</sup> | 29.85 ± 1.45 <sup>d</sup>  | 61.69 ± 3.58 <sup>c</sup>  | 13.47 ± 1.46 <sup>ab</sup> | 2.64 ± 0.5 <sup>def</sup>  |
|                   | MetOH    | 6.82 ± 0.15 <sup>a</sup>  | 29.81 ± 0.75 <sup>a</sup>  | 17.07 ± 1.11 <sup>a</sup>  | 22.4 ± 1.85 <sup>f</sup>   | 51.39 ± 1.76 <sup>d</sup>  | 13.45 ± 2.05 <sup>ab</sup> | 4.33 ± 0.31 <sup>b</sup>   |
|                   | H2O      | 1.35 ± 0.04 <sup>f</sup>  | 5.36 ± 1.03 <sup>f</sup>   | 2.23 ± 0.44 <sup>g</sup>   | 16.55 ± 2.42 <sup>h</sup>  | 64.02 ± 4.02 <sup>c</sup>  | 6.57 ± 1.48 <sup>d</sup>   | 3.32 ± 0.39 <sup>bcd</sup> |
| Soxhlet (SOX)     | EA       | 6.93 ± 0.63 <sup>a</sup>  | 29.19 ± 4.19 <sup>a</sup>  | 8.54 ± 0.81 <sup>de</sup>  | 18.51 ± 3.22 <sup>gh</sup> | 75.22 ± 4.56 <sup>ab</sup> | 15.92 ± 1.78 <sup>a</sup>  | 1.41 ± 0.27 <sup>g</sup>   |
|                   | EtOH     | 4.96 ± 0.53 <sup>b</sup>  | 19.12 ± 4.1 <sup>d</sup>   | 8.96 ± 3.86 <sup>d</sup>   | 12.5 ± 0.53 <sup>i</sup>   | 45.93 ± 1.79 <sup>de</sup> | 12.97 ± 2.82 <sup>ab</sup> | 3.1 ± 0.2 <sup>cde</sup>   |
|                   | MetOH    | 6.77 ± 0.63 <sup>a</sup>  | 21.05 ± 2.84 <sup>cd</sup> | 15.78 ± 4.04 <sup>ab</sup> | 18.09 ± 1.9 <sup>gh</sup>  | 44.8 ± 1.73 <sup>e</sup>   | 11.53 ± 0.54 <sup>bc</sup> | 17.5 ± 1.45 <sup>a</sup>   |
|                   | H2O      | 2.04 ± 0.17 <sup>e</sup>  | 7.79 ± 0.69 <sup>f</sup>   | 12.5 ± 0.21 <sup>c</sup>   | 36.87 ± 2.67 <sup>c</sup>  | 45.44 ± 0.68 <sup>de</sup> | 9.22 ± 0.84 <sup>cd</sup>  | 3.69 ± 0.29 <sup>bcd</sup> |

Results are expressed as mean value ± standard deviation (n = 3) and reported as mg equivalents/g dry matter. Different superscript letters in the same column indicate significant differences in the extracts (p < 0.05) using Duncan's post hoc test. EA= ethyl acetate, EtOH= ethanol, MetOH= Methanol, H2O= water, LMW= low molecular weight.
