# Supplementary material for: Phytochemical Constituents and Biological Activities of the Unexplored Plant Rhinanthus angustifolius subsp. grandiflorus
Source: MDPI journal article supplement (doi:10.3390/app11199162), 2021-10-01
Supplement: s1 [file s1]

**Table S5.** Semi-quantitative values of the main phytochemical classes of *Rhinanthus angustifolius* extracted with different methods (i.e., homogenizer, maceration, soxhlet) and different solvents (ethyl acetate, ethanol, methanol, water).

| Methods              | Solvents | Polyphenols                 | Sesquiterpene lactones      | Triterpenes                | Alkaloids                  |
|----------------------|----------|-----------------------------|-----------------------------|----------------------------|----------------------------|
| Homogenizer<br>(HAE) | EA       | 136.97 ± 3.95 <sup>c</sup>  | 47.73 ± 2.72 <sup>bc</sup>  | 6.71 ± 0.33 <sup>ab</sup>  | 0.39 ± 0.02 <sup>cd</sup>  |
|                      | EtOH     | 176.89 ± 4.3 <sup>a</sup>   | 44.11 ± 3.7 <sup>bc</sup>   | 5.57 ± 2.31 <sup>abc</sup> | 0.52 ± 0.23 <sup>cd</sup>  |
|                      | MetOH    | 172.57 ± 6.74 <sup>a</sup>  | 59.44 ± 11.68 <sup>a</sup>  | 6.41 ± 0.69 <sup>abc</sup> | 0.73 ± 0.28 <sup>bc</sup>  |
|                      | H2O      | 106.41 ± 6.15 <sup>e</sup>  | 31.21 ± 0.74 <sup>e</sup>   | 1.29 ± 0.33 <sup>e</sup>   | 0.9 ± 0.31 <sup>ab</sup>   |
| Maceration<br>(MAC)  | EA       | 148.18 ± 5.58 <sup>b</sup>  | 44.88 ± 1.12 <sup>bc</sup>  | 5.45 ± 1.75 <sup>abc</sup> | 0.32 ± 0.05 <sup>d</sup>   |
|                      | EtOH     | 152.86 ± 6.99 <sup>b</sup>  | 42.01 ± 3.55 <sup>cd</sup>  | 6.43 ± 0.17 <sup>abc</sup> | 1.18 ± 0.39 <sup>a</sup>   |
|                      | MetOH    | 145.27 ± 6.64 <sup>bc</sup> | 53.9 ± 9.6 <sup>ab</sup>    | 4.47 ± 1.72 <sup>bcd</sup> | 0.68 ± 0.23 <sup>bcd</sup> |
|                      | H2O      | 99.4 ± 7.14 <sup>e</sup>    | 31.52 ± 8.34 <sup>e</sup>   | 0.68 ± 0.1 <sup>e</sup>    | 0.51 ± 0.06 <sup>cd</sup>  |
| Soxhlet<br>(SOX)     | EA       | 155.72 ± 9.54 <sup>b</sup>  | 43.9 ± 4.34 <sup>bc</sup>   | 4.31 ± 2.47 <sup>cd</sup>  | 0.47 ± 0.02 <sup>cd</sup>  |
|                      | EtOH     | 107.54 ± 5.9 <sup>bde</sup> | 38.15 ± 2.91 <sup>cde</sup> | 7.59 ± 0.34 <sup>a</sup>   | 0.89 ± 0.06 <sup>ab</sup>  |
|                      | MetOH    | 135.52 ± 3.44 <sup>c</sup>  | 44.08 ± 0.91 <sup>bc</sup>  | 2.38 ± 0.5 <sup>de</sup>   | 0.43 ± 0.09 <sup>cd</sup>  |
|                      | H2O      | 117.55 ± 1.07 <sup>d</sup>  | 32.36 ± 2.78 <sup>de</sup>  | 0.89 ± 0.18 <sup>e</sup>   | 0.46 ± 0.04 <sup>cd</sup>  |

Results are expressed as mean value ± standard deviation (n = 3) and reported as mg equivalents/g dry matter. Different superscript letters in the same column indicate significant differences in the extracts (p < 0.05) using Duncan's post hoc test. EA= ethyl acetate, EtOH= ethanol, MetOH=Methanol, H2O= water.
